# Supplementary material for: A Molecular Signal Integration Network Underpinning Arabidopsis Seed Germination
Source: PubMed Central journal article supplement (PMC7544511; doi:10.1016/j.cub.2020.07.012), 2020-10-05
Supplement: mmc1.pdf [file mmc1.pdf]

**Current Biology, Volume 30**

**Supplemental Information**

**A Molecular Signal Integration Network**

**Underpinning *Arabidopsis* Seed Germination**

**Hao Xu, Ourania Lantzouni, Tonko Bruggink, Rene Benjamins, Frank Lanfermeijer, Katherine Denby, Claus Schwechheimer, and George W. Bassel**

# Supplementary Information

## A molecular signal integration network underpinning *Arabidopsis* seed germination

Hao Xu<sup>1</sup>, Ourania Lantzouni<sup>2</sup>, Tonko Bruggink<sup>4</sup>, Rene Benjamins<sup>4</sup>, Frank Lanfermeijer<sup>4</sup>, Katherine Denby<sup>3</sup>, Claus Schwechheimer<sup>2</sup>, George W. Bassel<sup>1,\*</sup>

<sup>1</sup> School of Life Sciences, University of Warwick, Coventry, CV4 7AL, UK

<sup>2</sup> Plant Systems Biology, Technical University of Munich, 85354 Freising, Germany

<sup>3</sup> Department of Biology, University of York, York, YO10 5DD, UK

<sup>4</sup> Applied Physiology, Syngenta Seeds B.V., P.O. Box 2, NL-1600AA Enkhuizen, The Netherlands

### **CORRESPONDING AUTHOR**

\*To whom correspondence should be addressed: [george.bassel@warwick.ac.uk](mailto:george.bassel@warwick.ac.uk) (G.W.B);

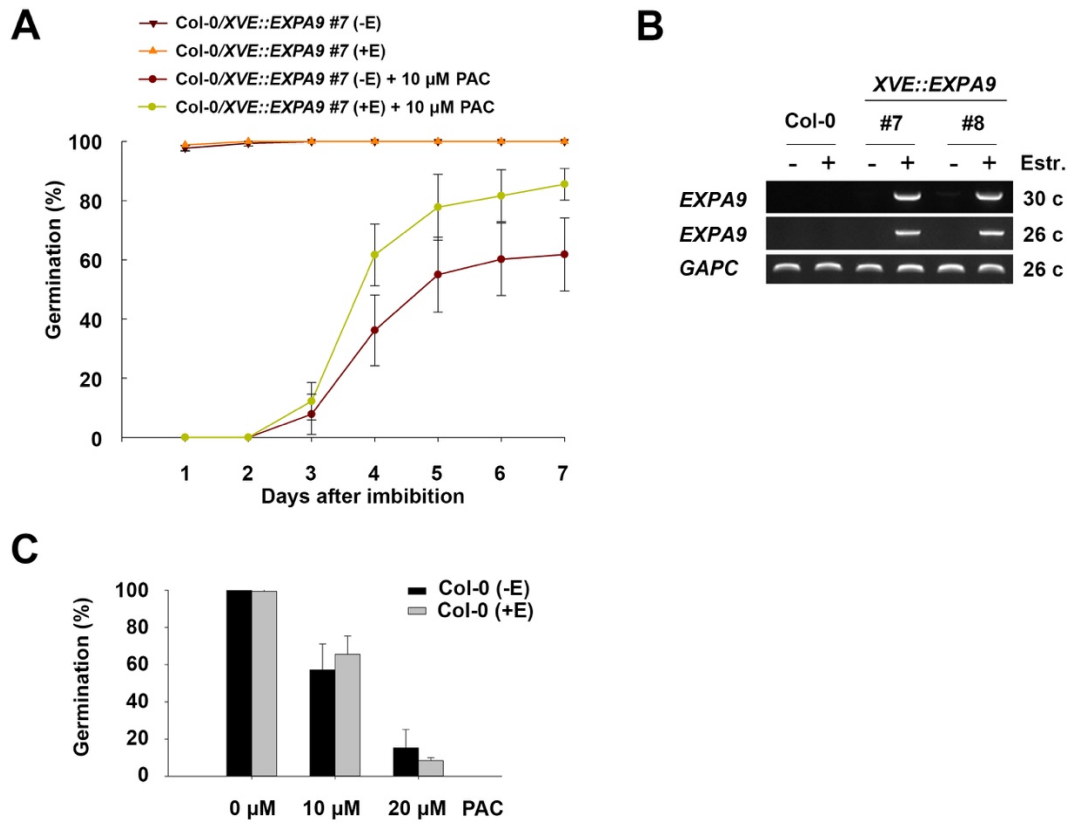

**Figure S1. Impact of *EXPA* expression on germination. Related to Figure 1.** (A) Germination of *XVE::EXPA9* line 7 seeds on water and 10  $\mu$ M PAC with and without the ectopic induction using estrogen (+/- E). (B) Induction of *EXPA9* in *XVE::EXPA9* lines 7 and 8 confirmed by RT-PCR using 3-day-old seedlings. The number of PCR cycles (c) used is indicated to the right of the gel. (C) Germination of wild-type Col-0 seeds in the presence of 30  $\mu$ M estrogen and different concentrations of PAC. No significant differences between genotypes were present.

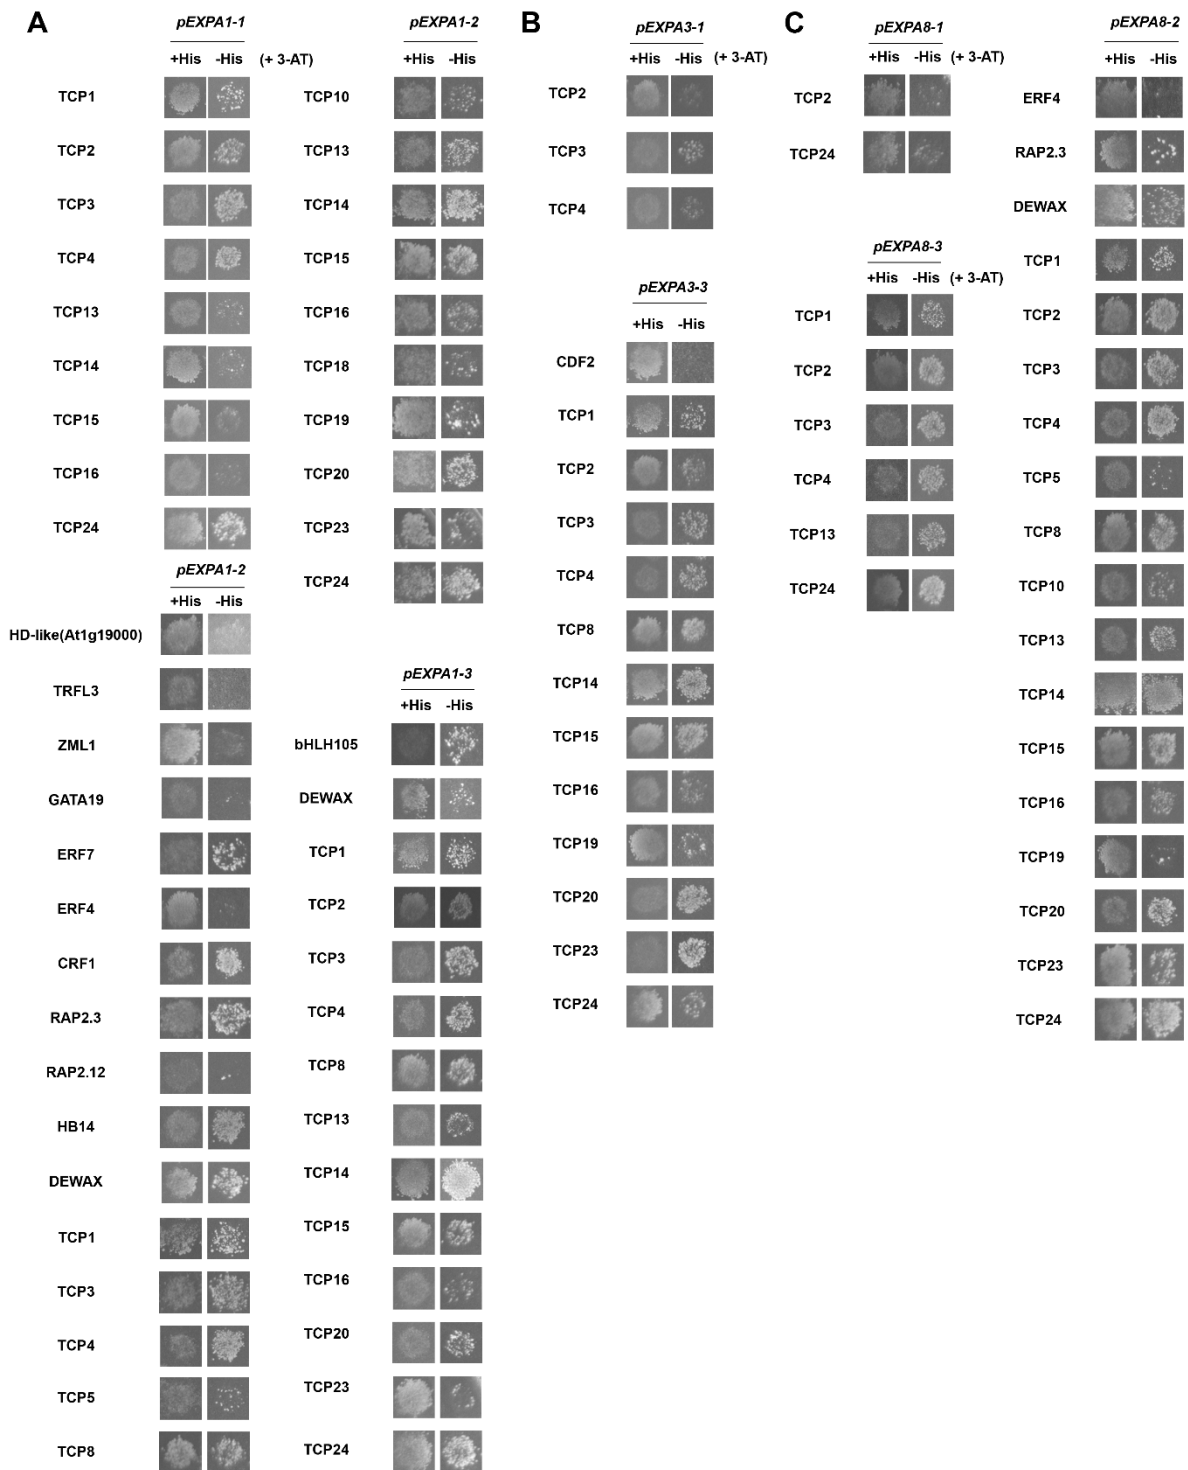

**Figure S2. Y1h screening of *EXPA* promoter fragments. Related to Figure 2. (A)** Colonies showing yeast 1-hybrid interactions between TFs and *EXPA1* promoter fragments. (B) Same as (A) showing for the *EXPA3* promoter, and (C) for the *EXPA8* promoter. The promoter fragment used as bait is indicated. Image panels on the left show yeast growth on SD-Leu-Trp media, and on the right SD-Leu-Trp-His (+ 3-AT as required).

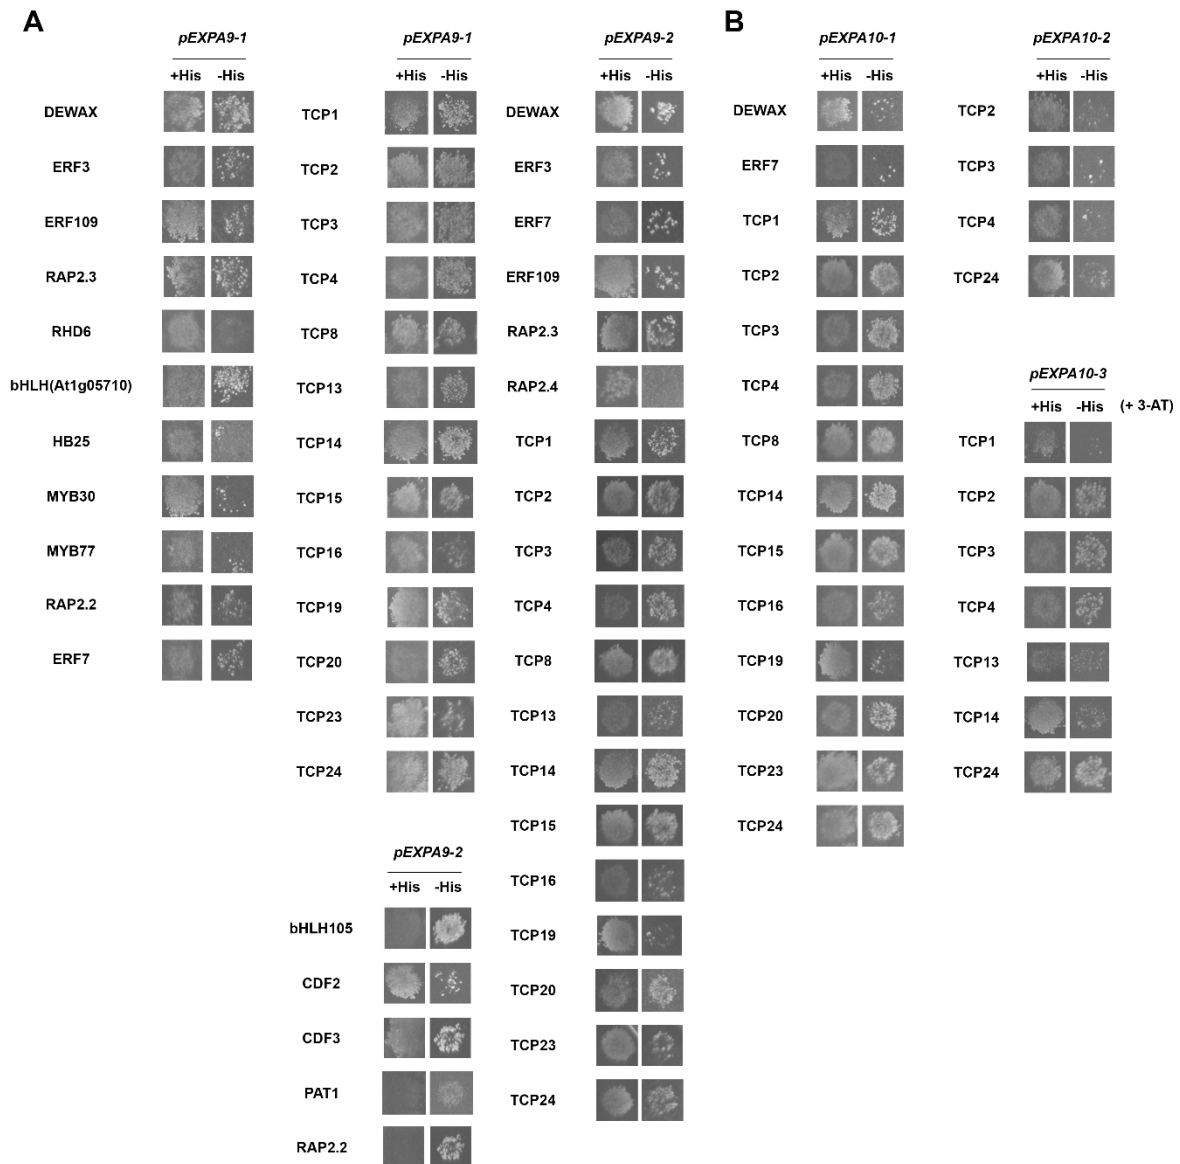

**Figure S3. Y1h screening of *EXPA* promoter fragments. Related to Figure 2. (A) Colonies showing yeast 1-hybrid interactions between TFs and *EXPA9* promoter fragments. (B) Same as (A) showing for the *EXPA10* promoter. The promoter fragment used as bait is indicated. Image panels on the left show yeast growth on SD-Leu-Trp media, and on the right SD-Leu-Trp-His (+ 3-AT as required).**

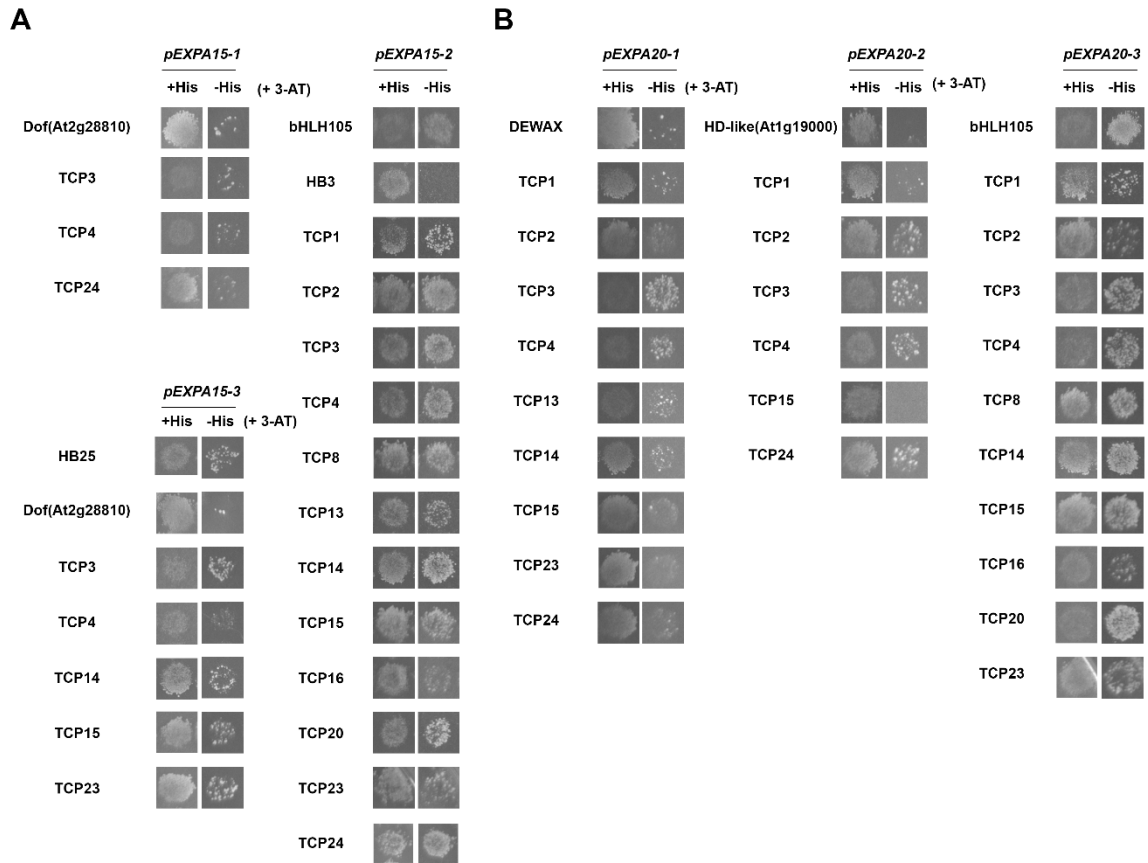

**Figure S4. Y1h screening of *EXPA* promoter fragments. Related to Figure 2. (A) Colonies showing yeast 1-hybrid interactions between TFs and *EXPA15* promoter fragments. (B) Same as (A) showing for the *EXPA20* promoter. The promoter fragment used as bait is indicated. Image panels on the left show yeast growth on SD-Leu-Trp media, and on the right SD-Leu-Trp-His (+ 3-AT as required).**

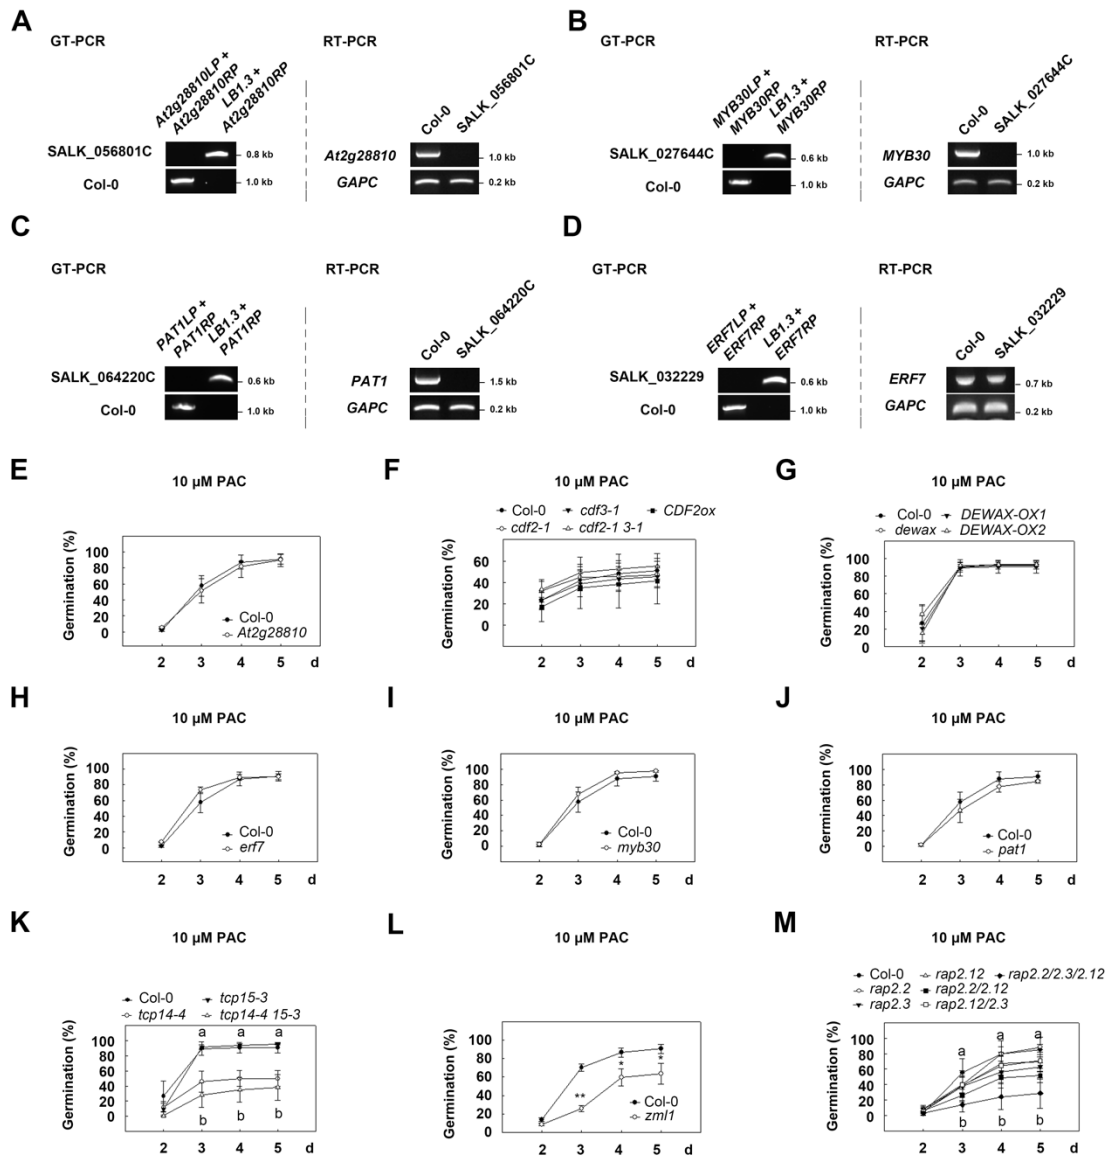

**Figure S5. Phenotyping DELLA and EXPA-binding TF mutant seeds. Related to Figure 5.** (A) Genotyping PCR using genomic DNA confirming the T-DNA insertion in *At2g28810* (GT-PCR), and the lack of transcript for this gene using RT-PCR. (B) Same as (A) for *MYB30*. (C) Same as (A) for *PAT1*. (D) Same as (A) for *ERF7*. (E) Germination of *At2g28810* mutant seeds on 10 μM PAC. (F) Same as (E) for *cdf2 cdf3* mutant seeds. (G) Same as (E) for *dewax* mutant and overexpressing seeds. (H) Same as (E) for *erf7* mutant seeds. (I) Same as (E) for *myb30* mutant seeds. (J) Same as (E) for *pat1* mutant seeds. (K) Same as (E) for *tcp14* and *tcp15* mutant seeds. Different lowercase letters indicate statistically significant differences (one-way ANOVA with Tukey post hoc test,  $P < 0.05$ ). (L) Same as (E) for *zml1* mutant seeds. Asterisks indicate significant pairwise differences in comparison to the wild type control using Student's *t*-test (\*,  $P < 0.05$ ; \*\*,  $P < 0.01$ ). (M) Same as (E) for *rap2.2 rap2.3* and *rap2.12* mutant seeds. Different lowercase letters indicate statistically significant differences (one-way ANOVA with Tukey post hoc test,  $P < 0.05$ ).

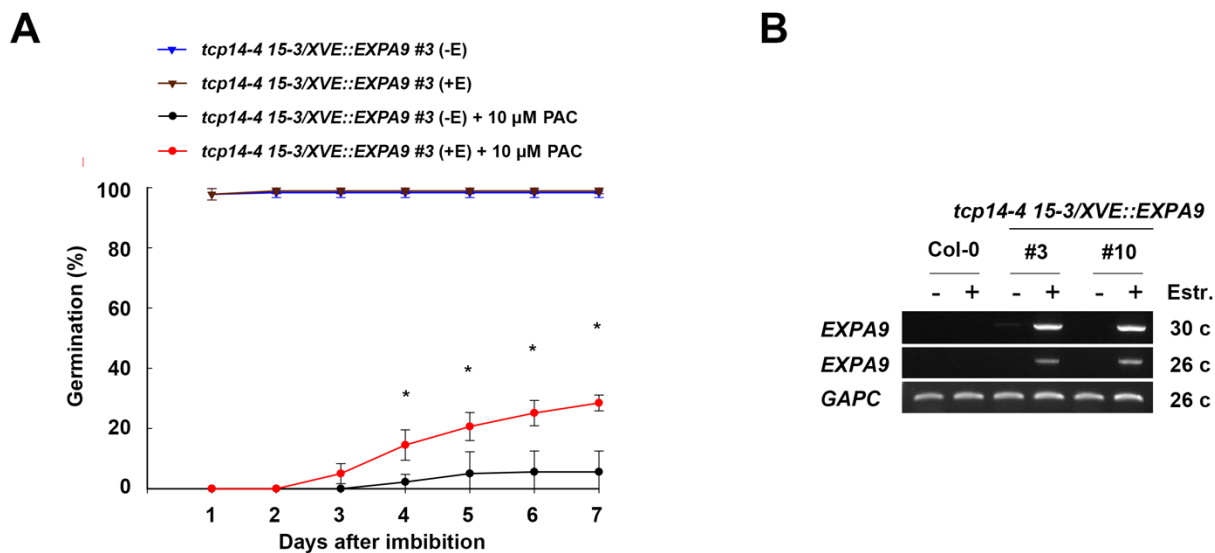

**Figure S6. Complementation of the *tcp14 tcp15* phenotype by *EXPA* expression. Related to Figure 6.** (A) Germination of *XVE::EXPA9* in the *tcp14-4 tcp15-3* line 3 on water and 10  $\mu$ M PAC in the absence (-E) and presence (+E) of 30  $\mu$ M estrogen. (B) RT-PCR confirming the induction of *EXPA9* in response to estrogen application in two independent lines of *tcp14-4 tcp15-3/XVE::EXPA9*. 3-d-old seedlings were used for RNA extraction.
